# Supplementary material for: Temporal quantitative profiling of sialyllactoses and sialic acids after oral administration of sialyllactose to mini-pigs with osteoarthritis
Source: Royal Society of Chemistry journal article supplement (doi:10.1039/d2ra05912f), 2023-01-01
Supplement: d2ra05912f1.pdf [file d2ra05912f1.pdf]

**Temporal quantitative profiling of sialyllactoses and sialic acids after oral  
administration of sialyllactose to mini-pig with osteoarthritis**

Dan Bi Park<sup>a,b</sup>, Lila Kim<sup>a</sup>, Jeong Ho Hwang<sup>e</sup>, Kyung-Tai Kim<sup>e</sup>, Ji Eun Park<sup>b,c</sup>, Jong-Soon  
Choi<sup>b,d</sup>, and Hyun Joo An<sup>b,c\*</sup>

<sup>a</sup>GeneChem Inc., Yuseong-gu, Daejeon 34025, Republic of Korea.

<sup>b</sup>Graduate School of Analytical Science and Technology, Chungnam National University,  
Daejeon 34134, Republic of Korea.

<sup>c</sup>Asia Glycomics Reference Site, Daejeon 34134, Republic of Korea.

<sup>d</sup>Research Center for Materials Analysis, Korea Basic Science Institute, Daejeon, 34133,  
Republic of Korea.

<sup>e</sup>Animal Model Research Group, Jeonbuk Branch Institute, Korea Institute of Toxicology,  
Jeollabukdo, 56212, Republic of Korea.

\* Corresponding author:

Hyun Joo An, Ph.D.

#455, College of Engineering II, Chungnam National University,

99 Daehak-ro, Yuseong-gu, Daejeon 34134, Republic of Korea.

Tel: +82-42-821-8547, Fax: +82-42-821-8541, E-mail: [hjan@cnu.ac.kr](mailto:hjan@cnu.ac.kr)

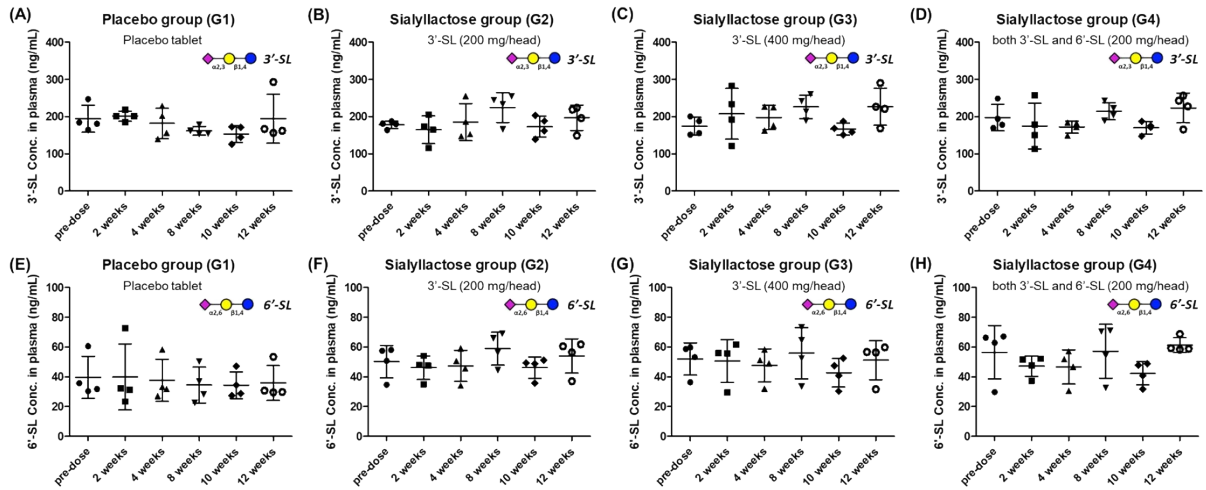

**Figure S 1. Concentration-time profiles of 3'-SL and 6'-SL as a group.** Concentrations (ng/mL) are shown in left panel for 3'-SL (A-D) and 6'-SL (E-H). Placebo group (Placebo tablet supplementation), SL group (SL tablet supplementation). Values are means  $\pm$  SDs, G1 (placebo),  $n = 4$ ; G2 (3'-SL, 200 mg),  $n = 4$ ; G3 (3'-SL, 400 mg),  $n = 4$ ; G4 (3'- and 6'-SL, respectively 200 mg),  $n = 4$ . \*Means differ,  $P < 0.05$ ; \*\*  $P < 0.01$ ; \*\*\*  $P < 0.001$ .

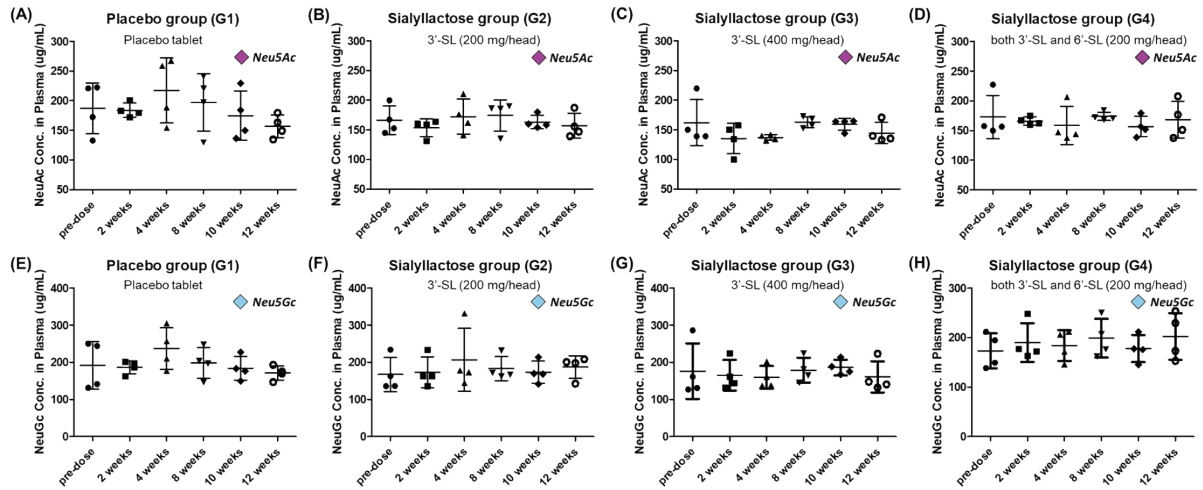

**Figure S 2. Concentration-time profiles of Neu5Ac and Neu5Gc as a group.** Concentrations ( $\mu\text{g/mL}$ ) are shown in left panel for Neu5Ac (A-D) and Neu5Gc (E-H). Placebo group (Placebo tablet supplementation), SL group (SL tablet supplementation). Values are means  $\pm$  SDs, G1 (placebo),  $n = 4$ ; G2 (3'-SL, 200 mg),  $n = 4$ ; G3 (3'-SL, 400 mg),  $n = 4$ ; G4 (3'-and 6'-SL, respectively 200 mg),  $n = 4$ . \*Means differ,  $P < 0.05$ ; \*\*  $P < 0.01$ ; \*\*\*  $P < 0.001$ .

**Table S 1. The primers for real-time PCR.**

| Genes | Sequence (5' to 3')     |
|-------|-------------------------|
| GAPDH | F AGTGAACGGATTTGGCCGC   |
|       | R GTGGAGGTCAATGAAGGGGTC |
| MMP1  | F CAAGGTATTGGAGGGGATGC  |
|       | R TTCATGAGCAGCCACACGAT  |
| MMP12 | F GCTGACGATAGAAACAACGCC |
|       | R TGTCCGGTCACATTTAGCCC  |

## Results for method validation of 3'-SL and 6'-SL in mini-pig plasma

### Matrix effect

The matrix effect was evaluated by the IS-normalized MF in samples spiked with low- and high-quality control samples using six individual samples (**Table S2**). In 3'-SL, the low concentration average was 1.14 with a CV of 4.64 %, and the high concentration average was 1.01 with a CV of 14.49 %. In 6'-SL, the IS-normalized MF average of low concentration was 1.14 with a CV of 6.07 %, and the high concentration was 1.19 with a CV of 13.84 %. Values satisfied the acceptance criteria.

### Recovery

Recovery was assessed at three concentrations of QC samples in plasma (**Table S2**). The recovery percentages were compared peak area between the spiked sample in solution extracted only blank plasma and extracted sample already spiked plasma. The recovery rate of 3'-SL was observed from 62.27 % to 71.87 %, and 6'-SL was from 51.00 % to 62.33 %. Regarding CV, it was found to be within  $\pm 15$  % of the acceptable standard for 3'-SL, 6'-SL, and IS.

### Linearity

The calibration curve, ranging from 40 to 2000 ng/mL, was obtained excellent linearity 0.9953 and 0.9959 for 3'-SL and 6'-SL, respectively (**Table S3**). The calibration accuracy range of the standard samples met the acceptance criteria within  $\pm 15$  % of the nominal value ( $\pm 20$  % for LLOQ).

### Selectivity

Selectivity was evaluated with LLOQ samples using real plasma of six different origins (**Table S4**). The actual plasma samples were 6 of 16 mini-pig plasma before SL-fed. None of the six plasma samples that spiked the LLOQ concentration had interfering peaks with the analyte. The CV (%) of the sixth repetition analysis was found to be within the acceptable standard ( $\pm 20$  % for LLOQ) of 10.23 % – 16.20 % in all analyses of the lowest quantification limit

concentration.

#### Accuracy and precision

Accuracy and precision were evaluated at the lowest limit, low, medium, and high concentration levels (40; 160; 800 and 1600 ng/mL, respectively). In the **Table S5**, the intra-day results ranged from 92.09 to 103.06 % at the 3'-SL and 86.26 to 104.05 % at the 6'-SL. Inter-day results ranged from 90.52 to 107.65 % and 90.05 to 114.93 % for 3'-SL and 6'-SL, respectively. The CV (%) did not exceed the acceptable limits for accuracy and precision both inter- and intra-day.

#### Stability

Stability was evaluated in low and high QC samples of standard stock solutions of 3'-SL and 6'-SL (**Table S6**). Benchtop and standard stock solution stabilities were compared after leaving the sample at room temperature for 4 h. The benchtop stability of QC samples of 3'-SL and 6'-SL were observed with an accuracy of 95.72 to 109.41 % for 3'-SL, and 111.59 to 112.27 % for 6'-SL. The freeze/thaw stability was also measured within acceptable standards with an accuracy ranged from 92.91 to 104.81 % and from 105.44 to 105.79 % for both 3'-SL and 6'-SL. Standard stock solutions were compared with peak area values before and after standing at room temperature. The stability was confirmed at 102.28 % and 101.18 % for 3'-SL and 6'-SL, respectively.

**Table S 2. Method validation data for 3'-SL and 6'-SL: matrix effect and recovery.**

|                               | 3'-SL |       |       | 6'-SL |       |       |
|-------------------------------|-------|-------|-------|-------|-------|-------|
| Nominal Concentration (ng/mL) | 160   | 800   | 1600  | 160   | 800   | 1600  |
| Matrix effect                 |       |       |       |       |       |       |
| Mean                          | 1.14  | -     | 1.01  | 1.14  | -     | 1.19  |
| CV (%)                        | 4.64  | -     | 14.49 | 6.07  | -     | 13.84 |
| Recovery                      |       |       |       |       |       |       |
| Mean (%)                      | 62.27 | 68.00 | 71.87 | 51.00 | 57.48 | 62.33 |
| CV (%)                        | 2.55  | 2.44  | 0.96  | 1.09  | 3.74  | 1.81  |

**Table S 3. Method validation data for 3'-SL and 6'-SL: linearity (calibration curve).**

| <b>3'-SL</b>                  |        |        |        |        |         |         |
|-------------------------------|--------|--------|--------|--------|---------|---------|
| Nominal Concentration (ng/mL) | 40.00  | 100.00 | 200.00 | 400.00 | 1000.00 | 2000.00 |
| Mean estimated conc. (ng/mL)  | 36.84  | 102.19 | 216.43 | 440.63 | 907.50  | 2036.67 |
| CV (%)                        | 8.19   | 2.35   | 3.62   | 0.46   | 1.26    | 0.76    |
| RE (%)                        | -7.91  | 2.19   | 8.22   | 10.16  | -9.25   | 1.83    |
| <b>6'-SL</b>                  |        |        |        |        |         |         |
| Nominal Concentration (ng/mL) | 40     | 100    | 200    | 400    | 1000    | 2000    |
| Mean estimated conc. (ng/mL)  | 34.50  | 107.03 | 219.67 | 438.83 | 899.87  | 2040.00 |
| CV (%)                        | 9.94   | 5.28   | 3.60   | 1.47   | 1.72    | 1.11    |
| RE (%)                        | -13.74 | 7.03   | 9.83   | 9.71   | -10.01  | 2.00    |

**Table S 4. Method validation data for 3'-SL and 6'-SL: selectivity.**

|                               | <b>3'-SL</b> | <b>6'-SL</b> |
|-------------------------------|--------------|--------------|
| Nominal Concentration (ng/mL) | 40           | 40           |
| Minipig 1                     | 118.48       | 112.86       |
| Minipig 2                     | 115.81       | 87.83        |
| Minipig 3                     | 88.02        | 91.44        |
| Minipig 4                     | 88.49        | 90.72        |
| Minipig 5                     | 94.79        | 91.54        |
| Minipig 6                     | 80.25        | 87.47        |
| Mean estimated conc. (ng/mL)  | 97.64        | 93.64        |
| SD                            | 15.82        | 9.58         |
| CV (%)                        | 16.20        | 10.23        |



**Table S 5. Method validation data for 3'-SL and 6'-SL: accuracy and precision.**

|                               | 3'-SL |        |        |         | 6'-SL |        |        |         |
|-------------------------------|-------|--------|--------|---------|-------|--------|--------|---------|
| Nominal Concentration (ng/mL) | 40    | 160    | 800    | 1600    | 40    | 160    | 800    | 1600    |
| Intra-day                     |       |        |        |         |       |        |        |         |
| Mean estimated conc. (ng/mL)  | 36.84 | 164.90 | 801.97 | 1477.00 | 34.50 | 163.57 | 832.37 | 1550.67 |
| Accuracy (%)                  | 92.09 | 103.06 | 100.25 | 92.31   | 86.26 | 102.23 | 104.05 | 96.92   |
| CV (%)                        | 8.19  | 2.19   | 1.06   | 1.98    | 9.94  | 0.92   | 1.60   | 1.51    |
| Inter-day                     |       |        |        |         |       |        |        |         |
| Mean estimated conc. (ng/mL)  | 36.21 | 172.24 | 841.38 | 1534.60 | 36.02 | 183.38 | 919.43 | 1710.20 |
| Accuracy (%)                  | 90.52 | 107.65 | 105.17 | 95.91   | 90.05 | 114.61 | 114.93 | 106.89  |
| CV (%)                        | 6.36  | 7.66   | 6.53   | 5.41    | 8.88  | 14.81  | 13.60  | 12.85   |

**Table S 6. Method validation data for 3'-SL and 6'-SL: stability.**

|                                               | 3'-SL      |            | 6'-SL      |            |
|-----------------------------------------------|------------|------------|------------|------------|
| Nominal concentration (ng/mL)                 | 160        | 1600       | 160        | 1600       |
| Benchtop stability (room temp. for 4 h)       |            |            |            |            |
| Mean estimated conc. (ng/mL)                  | 175.05     | 1531.50    | 180.36     | 1785.38    |
| CV (%)                                        | 1.66       | 6.42       | 2.54       | 3.45       |
| Freeze/thaw stability (three cycles)          |            |            |            |            |
| Mean estimated conc. (ng/mL)                  | 167.69     | 1486.56    | 168.70     | 1692.60    |
| CV (%)                                        | 7.57       | 5.49       | 2.38       | 7.80       |
| Stock solution stability (room temp. for 4 h) |            |            |            |            |
|                                               | before     | after      | before     | after      |
| Mean (area)                                   | 1954326.46 | 1998879.52 | 3126451.62 | 3163437.04 |
| CV (%)                                        | 1.35       | 0.76       | 3.01       | 2.55       |
